# Supplementary material
Source: publisher figshare collection journal article supplement (https://acs.figshare.com/ndownloader/files/5012275)
Supplement: Supplementary file 1 [file 5012275]

## Supporting Information

### Kinetic Study of the Gas-Phase Reactions of Nitrate Radicals with Methoxyphenol Compounds: Experimental and Theoretical Approaches

Amélie LAURAGUAIS<sup>(1,2)</sup>, Atallah EL ZEIN<sup>(1,2)</sup>, Cécile COEUR<sup>(1,2)\*</sup>, Emil OBEID<sup>(1,2)</sup>, Andy Cassez<sup>(1,2)</sup>, Marie-Thérèse RAYEZ<sup>(3,4)</sup>, Jean-Claude RAYEZ<sup>(3,4)</sup>

<sup>(1)</sup>Université Lille Nord de FRANCE

<sup>(2)</sup>Laboratoire de Physico-Chimie de l'Atmosphère, EA 4493, Wimereux, FRANCE

<sup>(3)</sup> Université de Bordeaux, ISM, UMR 5255, F-33400 Talence, France

<sup>(4)</sup> CNRS, ISM, UMR 5255, F-33400 Talence, France

\*Corresponding author. Tel.: +33 321 99 64 05; fax: +33 321 99 64 01.

Email address: coeur@univ-littoral.fr (C. Coeur).

Numbers of Figures: 10

Figure S1. Kinetic data plot for the reaction of 3-methoxyphenol (3-MP) with nitrate radicals at  $(294 \pm 3)$  K using *m*-cresol (■) and *o*-cresol (■) as reference compounds. For clarity, data obtained with *m*-cresol have been vertically shifted by 0.5 units. The organic compound concentrations were monitored with PTR-ToF-MS.

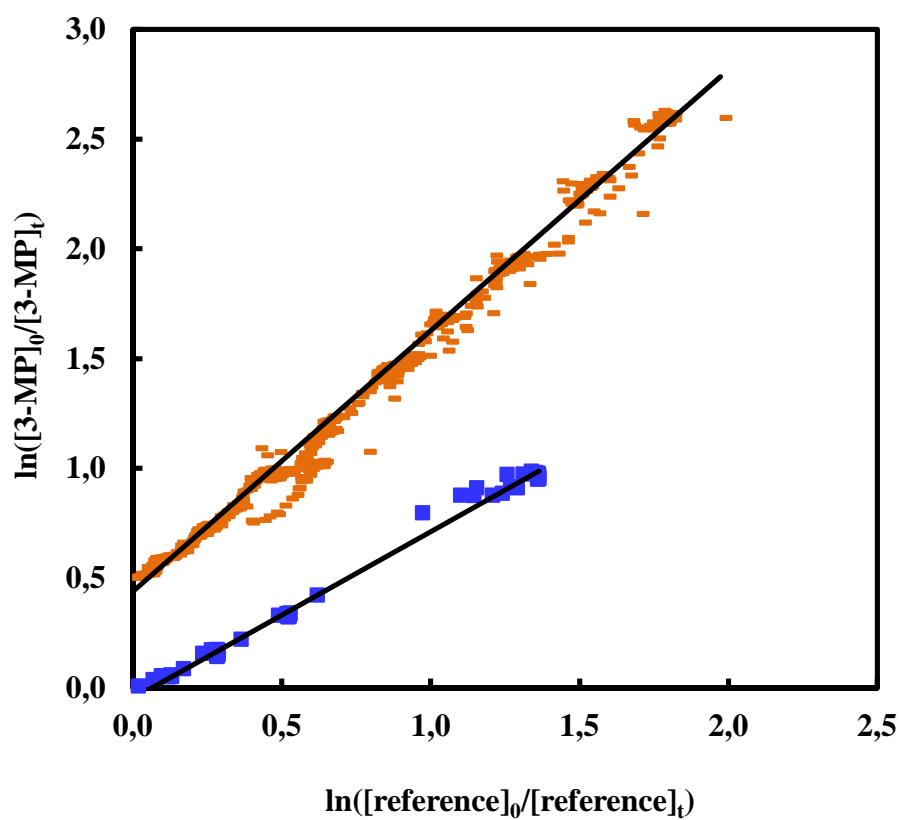

Figure S2. Kinetic data plot for the reaction of 4-methoxyphenol (4-MP) with nitrate radicals at  $(294 \pm 3)$  K using  $\alpha$ -phellandrene ( $\blacklozenge$ ) and catechol ( $\bullet$ ) as reference compounds. For clarity, data obtained with  $\alpha$ -phellandrene have been vertically shifted by 0.5 units. The organic compound concentrations were monitored with PTR-ToF-MS.

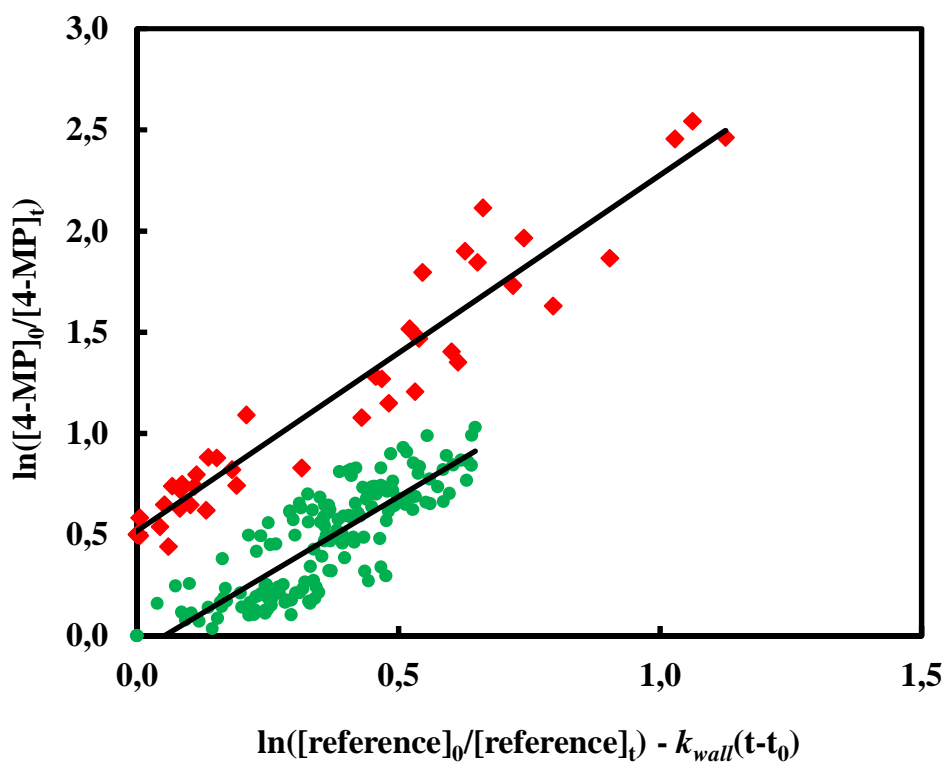

Figure S3. Kinetic data plot for the reaction of 2-methoxy-4-methylphenol (2-M-4-MeP) with nitrate radicals at  $(294 \pm 3)$  K using  $\alpha$ -phellandrene ( $\blacklozenge$ ) and catechol ( $\bullet$ ) as reference compounds. For clarity, data obtained with  $\alpha$ -phellandrene have been vertically shifted by 0.5 units. The organic compound concentrations were monitored with PTR-ToF-MS.

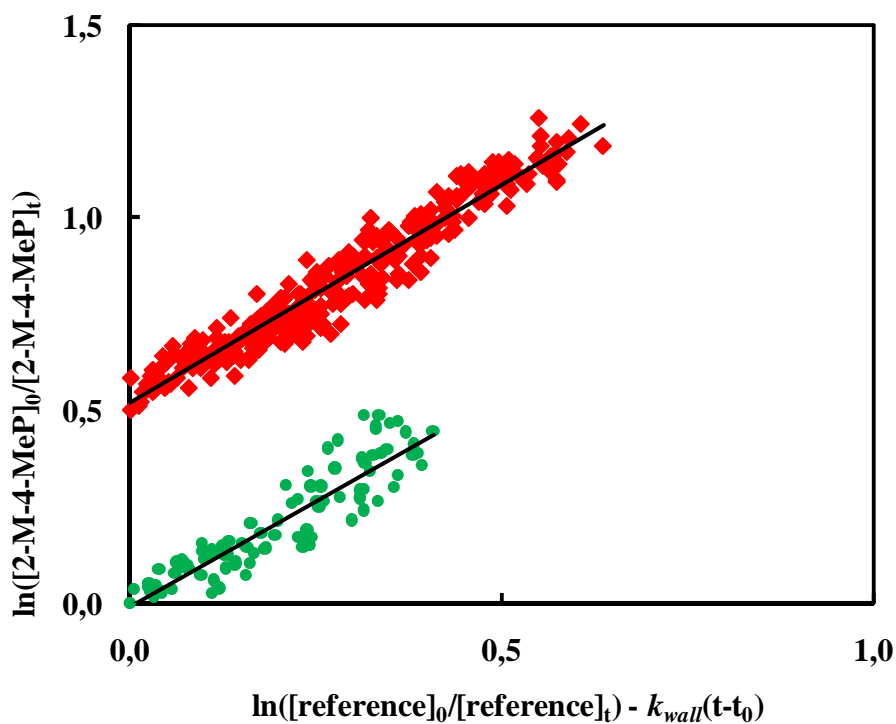

Figure S4. Kinetic data plot for the reaction of syringol (2,6-DMP) with nitrate radicals at  $(294 \pm 3)$  K using catechol (●) and 3-methylcatechol (▲) as reference compounds. For clarity, data obtained with catechol have been vertically shifted by 0.5 units. The organic compound concentrations were monitored with PTR-ToF-MS.

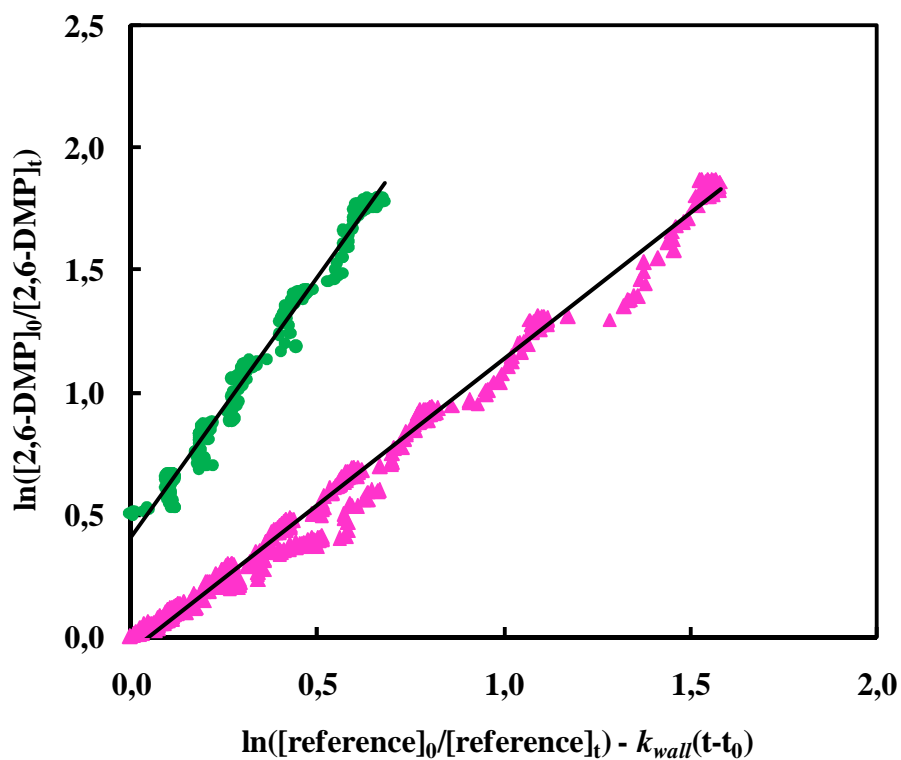

Figure S5. Relative stability,  $\Delta E_0$ , of the adducts formed from the reaction of 2-MP with nitrate radicals (calculation performed using DFT: UM06-2X/6-31G(d,p)).

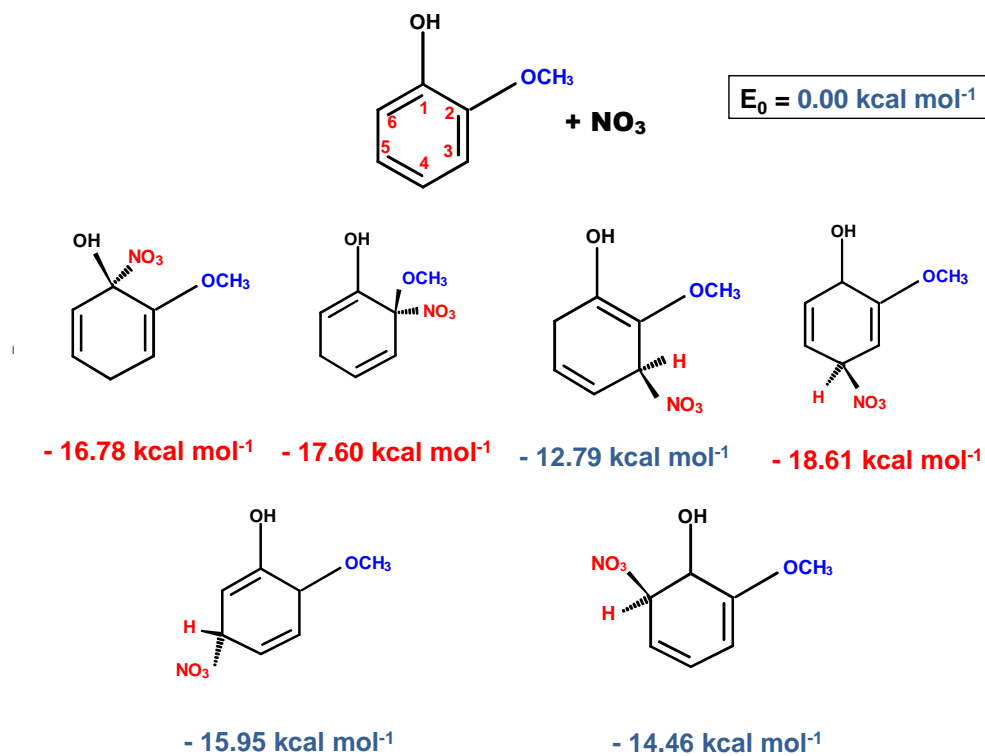

Figure S6. Relative stability,  $\Delta E_0$ , of the adducts formed from the reaction of 3-MP with nitrate radicals (calculation done using DFT: UM06-2X/6-31G(d,p)).

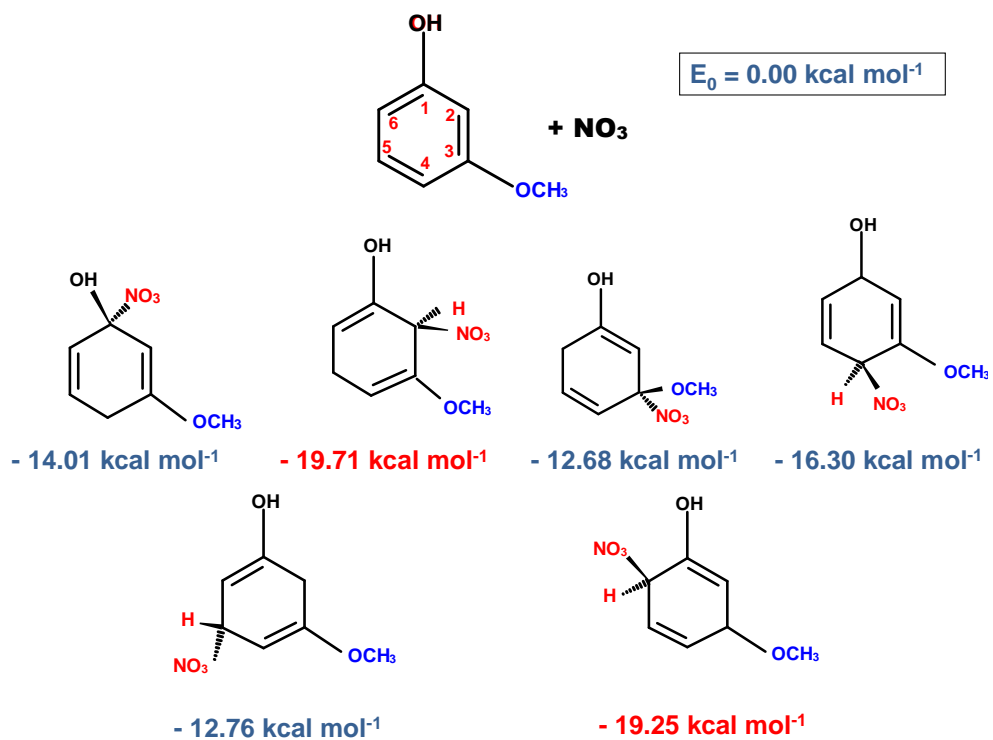

Figure S7. Relative stability,  $\Delta E_0$ , of the adducts formed from the reaction of 4-MP with nitrate radicals (calculation done using DFT: UM06-2X/6-31G(d,p)).

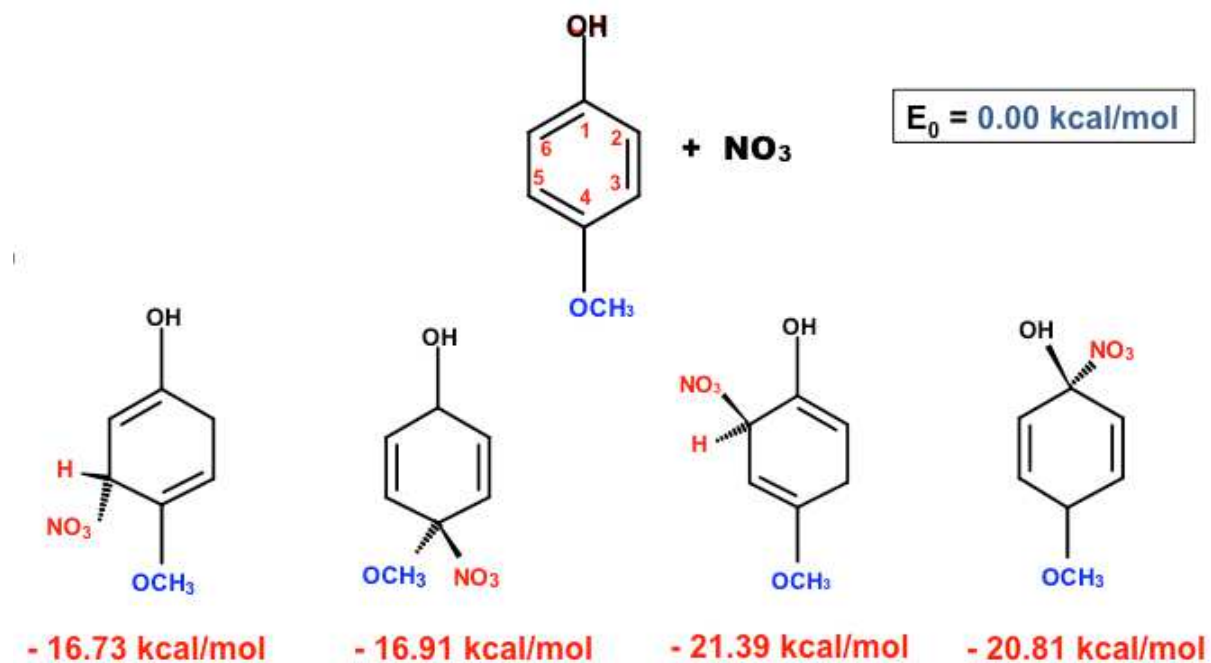



Figure S8. Relative stability,  $\Delta E_0$ , of the adducts formed from the reaction of 2-M-4-MeP with nitrate radicals (calculation done using DFT: UM06-2X/6-31G(d,p)).

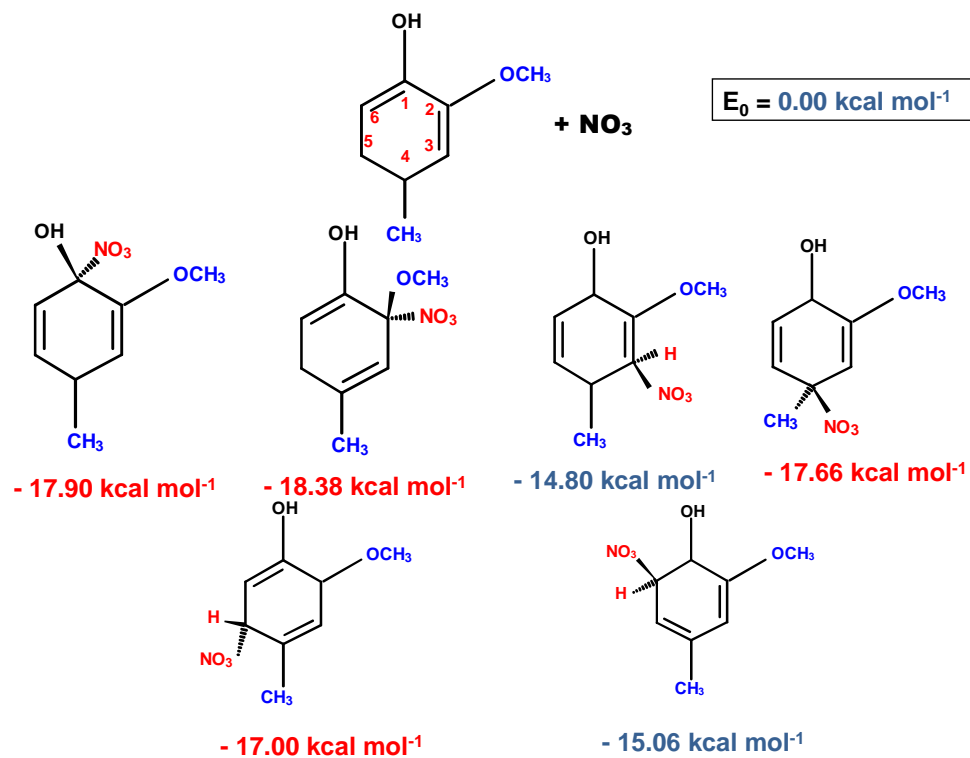

Figure S9. Relative stability,  $\Delta E_0$ , of the adducts formed from the reaction of 2,6-DMP with nitrate radicals (UM06-2X/6-31G(d,p) calculations).

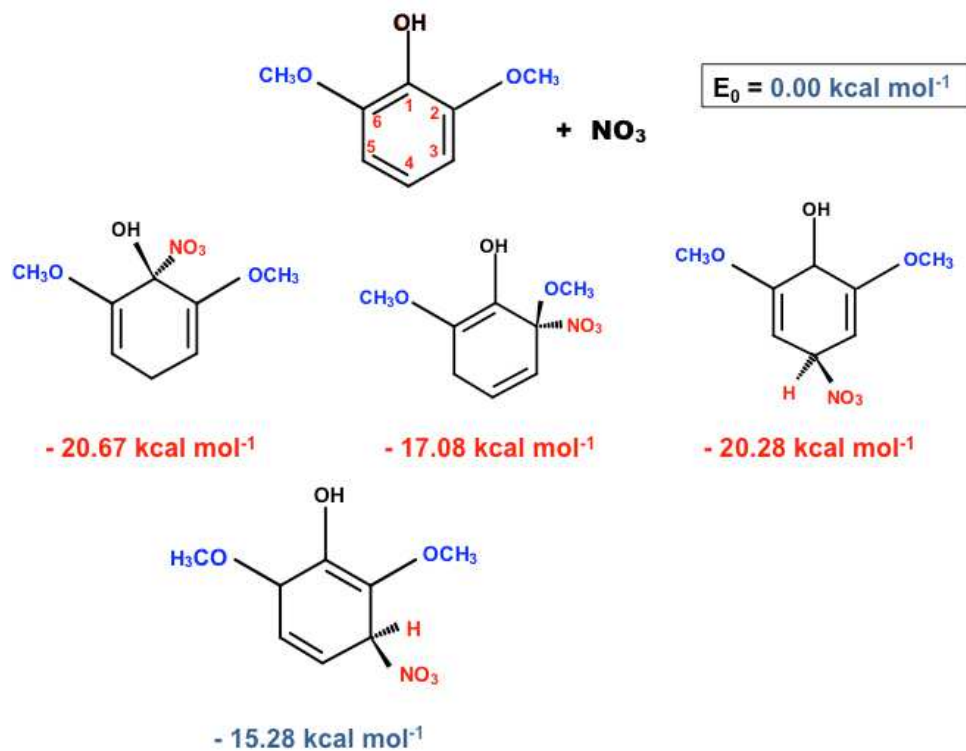

# S10. Theoretical NO<sub>3</sub> rate constants calculated if NO<sub>3</sub> is considered as a D<sub>3h</sub> symmetry system

If NO<sub>3</sub> is considered as a D<sub>3h</sub> symmetry system, then  $d_{\text{NO}_3} = 0$ . Consequently, we have to consider an interaction dipole-quadrupole and the long-range rate constant  $k$  takes now the following form (T independent):

$$k = 0.8568 \times \pi (d_A \cdot Q_B / \mu)^{1/2} (*)$$

The calculated value of the quadrupole moment of NO<sub>3</sub> is:  $Q_{\text{NO}_3} = 21.5$  Buckingham =  $21.5 \times 10^{-26}$  esu CGS. Using this formula, we get the following values for the NO<sub>3</sub> rate coefficients (in cm<sup>3</sup> molecule<sup>-1</sup> s<sup>-1</sup>):  $k_{2\text{-MP}(\text{theoretical})} = 23 \times 10^{-11}$ ,  $k_{3\text{-MP}(\text{theoretical})} = 20 \times 10^{-11}$ ,  $k_{4\text{-MP}(\text{theoretical})} = 11 \times 10^{-11}$ ,  $k_{2\text{M-4-MeP}(\text{theoretical})} = 20 \times 10^{-11}$  and  $k_{2\text{-6 DMP}(\text{theoretical})} = 21 \times 10^{-11}$ . These values are in the same range of magnitude and in the same order than those calculated using the value 0.71D for the dipole moment of NO<sub>3</sub>. So, the theoretical calculations lead to similar NO<sub>3</sub> rate coefficients for the methoxyphenols if NO<sub>3</sub> is considered with a C<sub>2v</sub> (interaction dipole-dipole) or D<sub>3h</sub> symmetry (interaction dipole-quadrupole).

---

(\*) Stoecklin, T.; C.E. Dateo, C. E.; Clary, D. C. Rate Constant Calculations on fast Diatom-Diatom Reactions *J. Chem. Soc. Faraday Trans.*, **1991**, 87, 1667-1679.
